1 [Title Page]

2 **Performance of the Verily Study Watch for Measuring Sleep Compared to**  
3 **Polysomnography**

4

5 **Authors:** Sohrab Saeb, PhD<sup>1\*</sup>; Benjamin W. Nelson, PhD<sup>1,2\*</sup>; Poulami Barman, MS<sup>1</sup>; Nishant  
6 Verma, PhD<sup>1</sup>; Hannah Allen, BS<sup>1</sup>; Massimiliano de Zambotti, PhD<sup>3</sup>; Fiona C. Baker, PhD<sup>3</sup>;  
7 Nicole Arra, BA<sup>3</sup>; Niranjan Sridhar, PhD<sup>1</sup>; Shannon S. Sullivan, MD, MSc<sup>1,4</sup>; Scooter Plowman,  
8 MD, MBA, MHSA, MSc<sup>1</sup>; Erin Rainaldi, MS<sup>1</sup>; Ritu Kapur, PhD<sup>1,5</sup>; Sooyoon Shin, PhD<sup>1</sup>

9 **Affiliations:**

10 <sup>1</sup>Verily Life Sciences, South San Francisco, CA, United States

11 <sup>2</sup>Division of Digital Psychiatry, Department of Psychiatry, Harvard Medical School and Beth  
12 Israel Deaconess Medical Center, Boston, MA, United States

13 <sup>3</sup>Center for Health Sciences, SRI, Menlo Park, California, USA, United States

14 <sup>4</sup>Division of Pulmonary, Asthma, and Sleep Medicine, Department of Pediatrics, Stanford  
15 University School of Medicine, Palo Alto, CA, United States

16 <sup>5</sup>Department of Neurology, Radboud University Medical Center, Nijmegen, Netherlands

17 \*These authors contributed equally to this work, first authorship shared

18

19 **Corresponding Author:**

20 Sohrab Saeb, PhD

21 Verily Life Sciences

22 279 E Grand Ave, South San Francisco, CA 94080

23 P. 650-495-7100

24 Email: [sosata@verily.com](mailto:sosata@verily.com)

25

26 **Keywords:** Sleep-wake detection; sleep stage; digital health measures; polysomnography; free-  
27 living; sleep detection accuracy; wearable technology

28 **Running title:** Verily Study Watch Performance Against PSG

29

30 **Article length:** Abstract, 215 (limit 250). Main, ~2156 (limit 4K)

31 **Disclosures/Acknowledgements page**

32

33 **Study funding statement:** The study was sponsored by Verily Life Sciences

34 **Data [code/materials] sharing statement:** Data from this study are not available due to the  
35 nature of this program. Participants did not consent for their data to be shared publicly.

36 **Authors' disclosures:**

37 S Saeb, BWN, PB, NV, HA, NS, S Sullivan, SP, ER, RK, S Shin report employment and  
38 equity ownership in Verily Life Sciences.

39 MDZ, FB and NA received research funding through their institution from Verily Life  
40 Sciences for study execution.

41 **Authors' contributions:**

42 Study concept and design: SSaeb, BWN, SSullivan, MdZ, RK, SShin

43 Data collection: Verily Life Sciences, FCB, NA

44 Data analysis and interpretation: PB, SSaeb

45 Draft writing and review: All

46 Draft approval for submission: All

47 **Acknowledgements:**

48 Authors wish to acknowledge participants and study personnel that made the study  
49 possible.

## 50 Abstract

51 **Introduction:** This study evaluated the performance of a wrist-worn wearable, Verily Study  
52 Watch (VSW), in detecting key sleep measures against polysomnography (PSG). **Methods:** We  
53 collected data from 41 adults without obstructive sleep apnea or insomnia during a single  
54 overnight laboratory visit. We evaluated epoch-by-epoch performance for sleep versus wake  
55 classification, sleep stage classification and duration, total sleep time (TST), wake after sleep  
56 onset (WASO), sleep onset latency (SOL), sleep efficiency (SE), and number of awakenings  
57 (NAWK). Performance metrics included sensitivity, specificity, Cohen's kappa, and Bland-  
58 Altman analyses. **Results:** Sensitivity and specificity (95% CIs) of sleep versus wake  
59 classification were 0.97 (0.96, 0.98) and 0.70 (0.66, 0.74), respectively. Cohen's kappa (95%  
60 CI) for 4-class stage detection was 0.64 (0.18, 0.82). Most VSW sleep measures had  
61 proportional bias. The mean bias values (95% CI) were 14.0 minutes (5.55, 23.20) for TST, -  
62 13.1 minutes (-21.33, -6.21) for WASO, 2.97% (1.25, 4.84) for SE, -1.34 minutes (-7.29, 4.81)  
63 for SOL, 1.91 minutes (-8.28, 11.98) for *light sleep* duration, 5.24 minutes (-3.35, 14.13) for  
64 *deep sleep* duration, and 6.39 minutes (-0.68, 13.18) for *REM sleep* duration. Mean and median  
65 NAWK count differences (95% CI) were 0.05 (-0.42, 0.53) and 0.0 (0.0, 0.0), respectively.  
66 **Discussion:** Results support applying the VSW to track overnight sleep measures in free-living  
67 settings. Registered at [clinicaltrials.gov](https://clinicaltrials.gov) (NCT05276362).

## 68 Introduction

69 Characterizing sleep in a free-living setting provides valuable insights into physical and mental  
70 health. Changes in sleep may be key in the diagnosis of sleep disorders like insomnia and  
71 hypersomnia, and are clinically meaningful components for tracking mental and cardiovascular  
72 health, as well as other conditions (Parish, 2009)(Freeman et al., 2020)(Tobaldini et al.,  
73 2019)(Young et al., 2008)(Ahmadi et al., 2009)(Hayashino et al., 2010). The gold standard for  
74 sleep assessment is lab-based polysomnography (PSG). However, PSG is resource intensive,  
75 challenging to administer and subject to intra- and inter-scoring variability, moreover, availability  
76 of PSG laboratories may be limited (Norman et al., 2000)(Deutsch et al., 2006). It is also  
77 impractical for long-term surveillance, and may be prone to artifacts that affect  
78 representativeness, such as altered sleep patterns due to the novelty of a laboratory, and/or the  
79 discomfort of the electrode setting (Toussaint et al., 1995). Furthermore, while portable PSG  
80 tools do exist, they still have limited application in free-living environments or routine clinical  
81 care.

82 Wearable sensors, particularly wrist-worn devices, provide a promising avenue for sleep  
83 assessment in free-living settings. These devices are widely available, relatively inexpensive,  
84 comfortable to wear during sleep and include physiological sensors, such as  
85 photoplethysmogram (PPG) and accelerometer, that can be used for sleep monitoring (Imtiaz,  
86 2021)(de Zambotti et al., 2024). However, before utilizing wearable-based technology as a  
87 routine approach to monitor daily sleep, whether for care or for research purposes, it is  
88 important to conduct performance evaluation of devices and algorithms compared to a gold  
89 standard reference such as PSG. Furthermore, researchers now know the importance of  
90 conducting those analytical and clinical evaluations across diverse and representative  
91 populations, such as participants with different ages or skin tones, to increase confidence in the  
92 generalizability of the results (Colvonen et al., 2020)(Baumert et al., 2023)(Nelson et al., 2020).

93 This study evaluated the performance of the Verily Study Watch (VSW, a wrist-worn wearable)  
94 to monitor sleep in a diverse cohort of sleepers without obstructive sleep apnea (OSA) or  
95 elevated insomnia symptoms, by comparing VSW sleep measures against measures obtained  
96 from PSG-based labels. The VSW classifies every 30-second epoch into 4 sleep-related stages:  
97 wake, light sleep, deep sleep, and rapid eye movement (REM) sleep. These classifications  
98 enable the calculation of multiple sleep measures that provide information on the quantity and  
99 the quality of an individual's overnight sleep. In this study, the measures of interest were: total  
100 sleep time (TST), wake after sleep onset (WASO), sleep efficiency (SE), sleep onset latency  
101 (SOL), number of awakenings (NAWK), and duration of each sleep stage. Our main objective  
102 was to compare epoch-by-epoch VSW- against PSG- derived classification of sleep-versus-  
103 wake state and of sleep stages. Additionally, we wanted to assess the VSW's accuracy for all  
104 computed sleep measures (listed above). Finally, we wanted to evaluate any potential variability  
105 in the performance of the VSW's sleep algorithm across demographic factors such as age, sex,  
106 body mass index (BMI), skin tone, and arm hair density.

## 107 Methods

### 108 Participants

109 The basic setup and eligibility for the study have been described elsewhere (Nelson, 2024,  
110 submitted). Eligible participants were between 18-80 years old, agreed to abstain from any  
111 drugs or medications that may affect sleep or wakefulness prior to and during the lab visit, and  
112 did not have identified symptoms of sleep disorders, such as obstructive sleep apnea (OSA,  
113 defined by OSA 50 score  $\geq 5$ ), or elevated insomnia symptoms (defined by having an insomnia  
114 severity index (ISI) score  $\geq 8$ ). The study was approved by the WCG Institutional Review Board  
115 (20215892), and all participants provided informed consent.

116 This study was registered at [clinicaltrials.gov](https://clinicaltrials.gov) (NCT05276362).

117

### 118 Data Collection

119 For each participant, data were collected during a single overnight stay in a sleep laboratory at a  
120 single site (SRI; Menlo Park, California), between February 14th and September 1st, 2023.  
121 Participants slept in comfortable, sound-proof and temperature-controlled bedrooms. Standard  
122 PSG protocols were used for preparation, recording procedures, and instrument calibration  
123 (Nelson, 2024, submitted).

124

### 125 Study Watch Data

126 During their overnight visit, participants wore the VSW on their dominant wrist. This analysis  
127 was part of a larger study including two devices: the Verily Numetric Watch (VNW) (Nelson,  
128 2024, submitted), in addition to the VSW. VSW is equipped with two sensors: a green-light PPG  
129 sensor, and a 3-axis accelerometer. Both sensors had a sampling frequency of 60 Hz (in the  
130 VNW, the PPG sensor consists of a green light emitter diode and two PPG signal channels and  
131 the sampling rate of the 3-axis accelerometer is 104 Hz). Using the PPG and accelerometer  
132 signals, the VSW classifies every 30-second epoch into one of the following 4 classes: *wake*,  
133 *light sleep*, *deep sleep*, and *REM sleep*.

134 The sleep stage classification algorithm consisted of a deep convolutional neural network that  
135 was initially trained using 10,000 nights of data from the Sleep Heart Health Study (SHHS) and  
136 Multi-Ethnic Study of Atherosclerosis (MESA) public datasets (Sridhar et al., 2020). The  
137 algorithm was fine-tuned using a smaller dataset collected at SRI, consisting of 30 nights of  
138 PSG-labeled data.

139 The overnight sleep measures, including TST, WASO, SE, SOL, NAWK, and sleep stage  
140 durations (Supplementary Table 1), for each participant were calculated using the VSW's  
141 predicted sleep stages, from the time the lights were turned off ("lights-off") to the time lights  
142 were turned back on ("lights-on"). VSW start time was synced to the Lights Off time recorded on  
143 PSG to ensure alignment for analysis of simultaneously recorded signals, using procedures  
144 described elsewhere (Nelson, 2024, submitted) (de Zambotti et al., 2019).

145

### 146 Reference Data

147 Standard laboratory PSG sleep assessment including electroencephalography (EEG),  
148 submental electromyography and bilateral electrooculography was performed according to the  
149 American Academy of Sleep Medicine (AASM) guidelines. Leg movement, electrocardiography  
150 (ECG), respiratory, and oxygen saturation signals were also collected and used to confirm the

151 absence of sleep disordered breathing. All recordings were performed using the Compumedics  
152 Grael® HD-PSG system (Compumedics, Abbotsford, Victoria, Australia). Two independent sleep  
153 scorers labeled every 30-second epoch of the PSG data by one of the following categories:  
154 *wake, N1, N2, N3, REM*. Inter-rater reliability (Kappa) between the two scorers was 91%, and  
155 discrepancies were resolved by a third scorer.

156 For this analysis, PSG stages *N1* and *N2* were combined into a single *light sleep* category, and  
157 PSG *N3* was termed *deep sleep*.

158 Similar to VSW, for each participant, the overnight sleep measures for PSG were calculated  
159 using the sleep scorer's stage labels from lights-off to lights-on.

160

## 161 **Performance Evaluation**

162 Performance evaluation was done based on an existing standardization framework (Menghini et  
163 al., 2021).

164 We evaluated the epoch-by-epoch performance of VSW's sleep stage classification against  
165 PSG in two ways: (1) *sleep* versus *wake* classification, using *sleep* as the positive class; and (2)  
166 4-class (*wake, light, deep, REM*) sleep stage classification. For the evaluation of sleep vs wake  
167 classification, we estimated sensitivity, specificity, positive predictive value (PPV), and negative  
168 predictive value (NPV). We calculated the 95% CI using cluster bootstrapping, and we  
169 accounted for the clustering of epochs within a participant using logistic mixed-effect regression  
170 models with the participant as random effect. For the 4-class stage classification, we used  
171 Cohen's kappa and accuracy along with their 95% bootstrapped CIs. Additionally we evaluated  
172 performance for each sleep stage by reporting Cohen's Kappa, accuracy, PPV and sensitivity  
173 using the average method (Menghini et al., 2021). To obtain performance metrics on each sleep  
174 stage, the outcomes were dichotomized to the sleep stage of interest against all others. The  
175 average method calculates kappa for each individual participant and then averages out the  
176 kappa across all participants with their associated bootstrapped 95% CIs. All analyses were  
177 confined to the lights-off to lights-on period.

178 For evaluating the performance of all overnight sleep measures except NAWK, we performed  
179 the Bland Altman analysis, estimating the mean bias and lower and upper limits of agreement,  
180 testing for the assumptions of proportional bias, heteroscedasticity, and normality. For NAWK,  
181 we estimated the mean and median count difference and linearly weighted Cohen's kappa with  
182 their 95% CIs.

183 Finally, we evaluated all performance metrics across the participant subgroups, including age,  
184 sex, BMI, skin tone, arm hair index. For subgroups with insufficient number of samples (< 10),  
185 we did not evaluate the performance.

186 All analyses were performed with R version 4.3.1 (2023-06-16).

## 187 Results

188 There were 41 adult participants (18 male, age range: 18-78 years) in this study. Participants  
189 had a diverse range of skin tones, BMI, and arm hair density (Supplementary Table 2).

190 VSW estimated sleep stages for a total of 38,796 epochs with data collected between lights-off  
191 and lights-on for each participant.

192 The sensitivity (95% CI) of the VSW in classifying sleep vs wake was 0.97 (0.96, 0.98),  
193 specificity (95% CI) was 0.70 (0.66, 0.74), PPV (95% CI) was 0.93 (0.92, 0.95), and NPV (95%  
194 CI) was 0.83 (0.78, 0.88) (Table 1).

195 The accuracy (95% CI) of the VSW sleep algorithm in classifying all 4 sleep stages was 0.78  
196 (0.58, 0.89), and the kappa (95% CI) was 0.64 (0.18, 0.82) (Table 2). There was variability in  
197 the performance across different sleep stages, with *light sleep* stage prediction having the  
198 lowest accuracy (Table 2), as there were instances of confusion between the *light sleep* stage  
199 and all other stages (Supplementary Table 3).

200 Mean bias and 95% CI values for all overnight sleep measures is shown in Table 3. Bland-  
201 Altman analyses (Figure 1) showed that all measures had significant proportional bias, with the  
202 VSW overestimating the measures at the lower end of the distribution, and underestimating  
203 them at the upper end, relative to the PSG. For all overnight sleep measures except the sleep  
204 stage durations, the assumption of normality was false, and for all measures except SE the  
205 assumption of homoscedasticity was true.

206 Performance of the VSW metrics across demographic subgroups of age, sex, BMI, skin tone,  
207 and arm hair density are reported (Supplementary Tables 4 and 5) without formal statistical  
208 testing, due to small subgroup sample size.

## 209 Discussion

210 The results of this study show the ability of the VSW to capture information related to sleep  
211 quantity and quality, as well as the distribution of sleep stages across overnight periods in  
212 individuals without OSA or elevated insomnia symptoms. The sensitivity and specificity of the  
213 VSW in classifying sleep vs wake were 0.97 and 0.70 respectively, and the Cohen's kappa for  
214 the 4-class stage classification was 0.64. This performance supports the application of the VSW  
215 to monitor overnight sleep in free-living settings.

216 As with other wearable sleep-wake detection devices (Pesonen and Kuula, 2018)(de Zambotti  
217 et al., 2016)(Miller et al., 2022), the sleep algorithm in this study was more likely to miss wake  
218 than sleep, as reflected in the higher sensitivity relative to specificity, and the positive and  
219 negative bias values for TST and WASO, respectively. When evaluating the performance of  
220 sleep monitoring devices, the AASM has established a range of 'allowable differences', based  
221 on actigraphy studies conducted in patients with specific sleep disorders (e.g. insomnia)(Smith  
222 et al., 2018). The 95% CIs of the mean bias estimates for TST, WASO, SOL, and SE measured  
223 by the VSW were within those allowable difference ranges. However, for the *proportional* mean  
224 bias estimates, which account for variations in bias over the range of measurement, 95% CIs  
225 exceeded these thresholds at lower and higher ends of the measurements (Figure 1).  
226 Nonetheless, applying the AASM standards to these results may require caution. Unlike the  
227 studies included in the AASM assessment, the present study excluded (via questionnaire)  
228 participants with symptoms of certain sleep disorders.

229 There are a few caveats to consider when interpreting our results. First, data collection for this  
230 study took place at a sleep laboratory, with standardized study boundaries and settings, such as  
231 lights-on/off to define the "in bed" time period when an individual is (in theory) set to sleep. Free-  
232 living environments are more organic and complex, and the generation of sleep measures in  
233 them may require additional layers of data. Following the prior example, defining "in bed" time  
234 may necessitate additional sensor readings, which then would be integrated into the derivation  
235 of the measures, particularly sleep stage classification and duration, or SOL.

236 Another caveat is that participants in this study were free of sleep-related diagnoses and  
237 symptoms (such as OSA or heightened insomnia symptoms). Participants with certain clinical  
238 conditions may manifest different patterns in their biological signals (e.g., pulse rate) and/or  
239 sleep architecture, which could complicate the sleep stage classification task. Future studies  
240 should evaluate the performance of VSW in real-world settings and in clinically relevant  
241 populations such as individuals with sleep disorders.

242 In summary, we evaluated the performance of the VSW and its algorithm to classify sleep  
243 versus wake state and the four different sleep stages in sleepers without OSA or heightened  
244 insomnia symptoms, as well as a series of measures that illustrate the quantity and quality of  
245 overnight sleep. The results demonstrate the potential of VSW to classify sleep vs wake states  
246 and sleep stages and compute overnight sleep measures when compared to gold-standard  
247 PSG measurements. These findings support further application of the VSW to tracking the  
248 overnight sleep behaviors in sleepers without OSA or heightened insomnia symptoms in free-  
249 living settings.



## 250 References

- 251 Ahmadi, N., Shapiro, G. K., Chung, S. A., and Shapiro, C. M. (2009). Clinical diagnosis of sleep  
252 apnea based on single night of polysomnography vs. two nights of polysomnography. *Sleep*  
253 *Breath.* 13, 221–226. doi: 10.1007/s11325-008-0234-2
- 254 Baumert, M., Hartmann, S., and Phan, H. (2023). Automatic sleep staging for the young and the  
255 old - Evaluating age bias in deep learning. *Sleep Med.* 107, 18–25. doi:  
256 10.1016/j.sleep.2023.04.002
- 257 Colvonen, P. J., DeYoung, P. N., Bosompra, N.-O. A., and Owens, R. L. (2020). Limiting racial  
258 disparities and bias for wearable devices in health science research. *Sleep* 43. doi:  
259 10.1093/sleep/zsaa159
- 260 Deutsch, P. A., Simmons, M. S., and Wallace, J. M. (2006). Cost-effectiveness of split-night  
261 polysomnography and home studies in the evaluation of obstructive sleep apnea syndrome. *J.*  
262 *Clin. Sleep Med.* 2, 145–153. Available at: <https://www.ncbi.nlm.nih.gov/pubmed/17557487>
- 263 de Zambotti, M., Baker, F. C., Willoughby, A. R., Godino, J. G., Wing, D., Patrick, K., et al.  
264 (2016). Measures of sleep and cardiac functioning during sleep using a multi-sensory  
265 commercially-available wristband in adolescents. *Physiol. Behav.* 158, 143–149. doi:  
266 10.1016/j.physbeh.2016.03.006
- 267 de Zambotti, M., Cellini, N., Goldstone, A., Colrain, I. M., and Baker, F. C. (2019). Wearable  
268 sleep technology in clinical and research settings. *Med. Sci. Sports Exerc.* 51, 1538–1557. doi:  
269 10.1249/MSS.0000000000001947
- 270 de Zambotti, M., Goldstein, C., Cook, J., Menghini, L., Altini, M., Cheng, P., et al. (2024). State  
271 of the science and recommendations for using wearable technology in sleep and circadian  
272 research. *Sleep* 47. doi: 10.1093/sleep/zsad325
- 273 Freeman, D., Sheaves, B., Waite, F., Harvey, A. G., and Harrison, P. J. (2020). Sleep  
274 disturbance and psychiatric disorders. *Lancet Psychiatry* 7, 628–637. doi: 10.1016/S2215-  
275 0366(20)30136-X
- 276 Hayashino, Y., Yamazaki, S., Takegami, M., Nakayama, T., Sokejima, S., and Fukuhara, S.  
277 (2010). Association between number of comorbid conditions, depression, and sleep quality  
278 using the Pittsburgh Sleep Quality Index: results from a population-based survey. *Sleep Med.*  
279 11, 366–371. doi: 10.1016/j.sleep.2009.05.021
- 280 Imtiaz, S. A. (2021). A Systematic Review of Sensing Technologies for Wearable Sleep Staging.  
281 *Sensors* 21. doi: 10.3390/s21051562
- 282 Menghini, L., Cellini, N., Goldstone, A., Baker, F. C., and de Zambotti, M. (2021). A  
283 standardized framework for testing the performance of sleep-tracking technology: step-by-step  
284 guidelines and open-source code. *Sleep* 44. doi: 10.1093/sleep/zsaa170
- 285 Miller, D. J., Sargent, C., and Roach, G. D. (2022). A Validation of Six Wearable Devices for  
286 Estimating Sleep, Heart Rate and Heart Rate Variability in Healthy Adults. *Sensors* 22. doi:  
287 10.3390/s22166317
- 288 Nelson, B.W., Low, C.A., Jacobson, N. Areán, P., Torous, J., Allen, N. B. (2020). Guidelines for

- 289 wrist-worn consumer wearable assessment of heart rate in biobehavioral research. *NPJ Digit.*  
290 *Med.* 3, 90. <https://doi.org/10.1038/s41746-020-0297-4>
- 291 Norman, R. G., Pal, I., Stewart, C., Walsleben, J. A., and Rapoport, D. M. (2000). Interobserver  
292 agreement among sleep scorers from different centers in a large dataset. *Sleep* 23, 901–908.  
293 Available at: <https://www.ncbi.nlm.nih.gov/pubmed/11083599>
- 294 Parish, J. M. (2009). Sleep-related problems in common medical conditions. *Chest* 135, 563–  
295 572. doi: 10.1378/chest.08-0934
- 296 Pesonen, A.-K., and Kuula, L. (2018). The Validity of a New Consumer-Targeted Wrist Device in  
297 Sleep Measurement: An Overnight Comparison Against Polysomnography in Children and  
298 Adolescents. *J. Clin. Sleep Med.* 14, 585–591. doi: 10.5664/jcsm.7050
- 299 Smith, M. T., McCrae, C. S., Cheung, J., Martin, J. L., Harrod, C. G., Heald, J. L., et al. (2018).  
300 Use of Actigraphy for the Evaluation of Sleep Disorders and Circadian Rhythm Sleep-Wake  
301 Disorders: An American Academy of Sleep Medicine Systematic Review, Meta-Analysis, and  
302 GRADE Assessment. *J. Clin. Sleep Med.* 14, 1209–1230. doi: 10.5664/jcsm.7228
- 303 Sridhar, N., Shoeb, A., Stephens, P., Kharbouch, A., Shimol, D. B., Burkart, J., et al. (2020).  
304 Deep learning for automated sleep staging using instantaneous heart rate. *NPJ Digit Med* 3,  
305 106. doi: 10.1038/s41746-020-0291-x
- 306 Tobaldini, E., Fiorelli, E. M., Solbiati, M., Costantino, G., Nobili, L., and Montano, N. (2019).  
307 Short sleep duration and cardiometabolic risk: from pathophysiology to clinical evidence. *Nat.*  
308 *Rev. Cardiol.* 16, 213–224. doi: 10.1038/s41569-018-0109-6
- 309 Toussaint, M., Luthringer, R., Schaltenbrand, N., Carelli, G., Lainey, E., Jacqmin, A., et al.  
310 (1995). First-night effect in normal subjects and psychiatric inpatients. *Sleep* 18, 463–469. doi:  
311 10.1093/sleep/18.6.463
- 312 Young, J. S., Bourgeois, J. A., Hilty, D. M., and Hardin, K. A. (2008). Sleep in hospitalized  
313 medical patients, part 1: factors affecting sleep. *J. Hosp. Med.* 3, 473–482. doi: 10.1002/jhm.372

314 Tables

315 Table 1. Performance of VSW's sleep vs wake classification against PSG reference.

316

---

|                      | <b>Sensitivity (95% CI)</b> | <b>Specificity (95% CI)</b> | <b>NPV (95% CI)</b> | <b>PPV (95% CI)</b> |
|----------------------|-----------------------------|-----------------------------|---------------------|---------------------|
| <b>Sleep vs Wake</b> | 0.97 (0.96, 0.98)           | 0.70 (0.66, 0.74)           | 0.83 (0.78, 0.88)   | 0.93 (0.92, 0.95)   |

---

CI: Confidence Interval; NPV: Negative Predictive Value; PPV: Positive Predictive Value

317

318 Table 2. VSW's performance in 4-class sleep stage detection against the PSG reference.

319

| <b>Sleep Stage</b> | <b>Kappa (95% CI)</b> | <b>Accuracy (95% CI)</b> | <b>PPV (95% CI)</b> | <b>Sensitivity (95% CI)</b> |
|--------------------|-----------------------|--------------------------|---------------------|-----------------------------|
| <b>Overall</b>     | 0.64 (0.18, 0.82)     | 0.78 (0.58, 0.89)        | NA                  | NA                          |
| <b>Wake</b>        | 0.70 (0.43, 0.90)     | 0.92 (0.76, 0.98)        | 0.82 (0.51, 0.98)   | 0.71 (0.45, 0.94)           |
| <b>Light</b>       | 0.60 (0.29, 0.78)     | 0.80 (0.66, 0.89)        | 0.80 (0.55, 0.91)   | 0.81 (0.59, 0.94)           |
| <b>Deep</b>        | 0.66 (0.17, 0.91)     | 0.92 (0.84, 0.98)        | 0.69 (0.09, 0.97)   | 0.77 (0.37, 0.98)           |
| <b>REM</b>         | 0.74 (0.38, 0.90)     | 0.92 (0.82, 0.98)        | 0.76 (0.44, 0.96)   | 0.84 (0.47, 0.99)           |

CI: confidence interval; PPV: Positive Predictive Value; REM: Rapid Eye Movement

320

Table 3. Performance of VSW overnight sleep measures against PSG reference.

| Measure            | Mean           |                | Assumptions            | Proport. Bias                                         |                      | Lower LOA                                             |                                  | Upper LOA                                         |                                  |                                                   |
|--------------------|----------------|----------------|------------------------|-------------------------------------------------------|----------------------|-------------------------------------------------------|----------------------------------|---------------------------------------------------|----------------------------------|---------------------------------------------------|
|                    | PSG (SD)       | VSW (SD)       |                        | Bias (95% CI)                                         | Estimate             | 95% CI                                                | Estimate                         | 95% CI                                            | Estimate                         | 95% CI                                            |
| <b>TST (min)</b>   | 384.98 (60.85) | 398.98 (49.04) | 14.00 (5.55, 23.20)    | Prop Bias = T<br>Normality = F<br>Heteroscedastic = F | 125.51 + -0.29 x PSG | Intercept = [65.50, 186.28]<br>Slope = [-0.45, -0.14] | -9.04                            | [-87.36,18.83]                                    | 105.04                           | [26.76,133.36]                                    |
| <b>WASO (min)</b>  | 62.72 (49.97)  | 49.60 (38.73)  | -13.12 (-21.33, -6.21) | Prop Bias = T<br>Normality = F<br>Heteroscedastic = F | 7.11 + -0.32 x PSG   | Intercept = [-3.68, 15.8]<br>Slope = [-0.51, -0.10]   | bias - 2.46(1.32 + 0.18 x PSG)   | Intercept = [-2.91, 6.58]<br>Slope = [0.06, 0.27] | bias + 2.46(1.32 + 0.18 x PSG)   | Intercept = [-2.91, 6.58], Slope = [0.06, 0.27]   |
| <b>SE (%)</b>      | 81.69 (11.71)  | 84.67 (9.01)   | 2.97 (1.25, 4.84)      | Prop Bias = T<br>Normality = F<br>Heteroscedastic = T | 30.04 + -0.33 x PSG  | Intercept = [14.81, 42.28]<br>Slope = [-0.47, -0.16]  | bias - 2.46(11.98 + -0.11 x PSG) | Intercept = [4.19, 21.56], Slope = [-0.22, -0.02] | bias + 2.46(11.98 + -0.11 x PSG) | Intercept = [4.19, 21.56], Slope = [-0.22, -0.02] |
| <b>SOL (min)</b>   | 25.43 (20.37)  | 24.09 (19.73)  | -1.34 (-7.29, 4.81)    | Prop Bias = T<br>Normality = F<br>Heteroscedastic = F | 11.7 + -0.51 x PSG   | Intercept = [3.28, 21.81]<br>Slope = [-0.86, -0.15]   | -44.21                           | [-84.21,-7.38]                                    | 34.21                            | [-5.59,70.51]                                     |
| <b>Light (min)</b> | 240.65 (49.27) | 242.56 (43.83) | 1.91 (-8.28, 11.98)    | Prop Bias = T<br>Normality = T<br>Heteroscedastic = F | 83.34 + -0.34 x PSG  | Intercept = [40.42, 123.65]<br>Slope = [-0.51, -0.17] | -25.06                           | [-119.66,-10.10]                                  | 107.06                           | [12.69,122.06]                                    |
| <b>Deep (min)</b>  | 63.39 (27.19)  | 68.62 (20.12)  | 5.24 (-3.35, 14.13)    | Prop Bias = T<br>Normality = T                        | 54.33 + -0.77 x PSG  | Intercept = [40.81, 67.44]<br>Slope = [-0.95, -       | -72.30                           | [-97.21,3.10]                                     | 39.31                            | [14.51,114.76]                                    |

|                  |               |               |                        |                                                          |                        |                                                                 |        |                |       |              |
|------------------|---------------|---------------|------------------------|----------------------------------------------------------|------------------------|-----------------------------------------------------------------|--------|----------------|-------|--------------|
|                  |               |               |                        | Heteroscedastic =                                        |                        | 0.60]                                                           |        |                |       |              |
|                  |               |               |                        | F                                                        |                        |                                                                 |        |                |       |              |
| <b>REM (min)</b> | 82.49 (25.46) | 88.88 (23.60) | 6.39<br>(-0.68, 13.18) | Prop Bias = T<br>Normality = T<br>Heteroscedastic =<br>F | 45.69 + -0.48 x<br>PSG | Intercept =<br>[26.79, 69.87]<br><br>Slope = [-0.78, -<br>0.24] | -21.48 | [-84.16,-3.21] | 68.48 | [5.91,86.55] |

| Measure             | PSG Mean (SD) | VSW Mean (SD) | Mean Difference (95% CI) | PSG Median | VSW Median | Median Difference (95% CI) | Linear Weighted Kappa (95% CI) |
|---------------------|---------------|---------------|--------------------------|------------|------------|----------------------------|--------------------------------|
| <b>NAWK (count)</b> | 2.17 (1.96)   | 1.88 (2.31)   | 0.05 (-0.42, 0.53)       | 1          | 1          | 0.0 (0.0, 0.0)             | 0.58 (0.41, 0.71)              |

CI: confidence interval; LOA: Limits of Agreement; NAWK: Night Awakenings; PPV: Positive Predictive Value; PSG: Polysomnography; REM: Rapid Eye Movement; SD: Standard Deviation; SE: Sleep Efficiency; SOL: Sleep Onset Latency; TST: Total Sleep Time; VSW: Verily Study Watch; WASO: Wake After Sleep Onset

Figure 1.

Bland-Altman plots of overnight sleep measures for the device (VSW) against the reference (PSG). Solid red lines indicate mean bias, dotted red lines indicate 95% CI of mean bias, solid gray lines indicate the 95% LOAs, and dotted gray lines indicate 95% CI of LOAs. Black dots are observations.

(CI: confidence interval; REM: Rapid Eye Movement; SD: Standard Deviation; SE: Sleep Efficiency; SOL: Sleep Onset Latency; TST: Total Sleep Time; WASO: Wake After Sleep Onset)

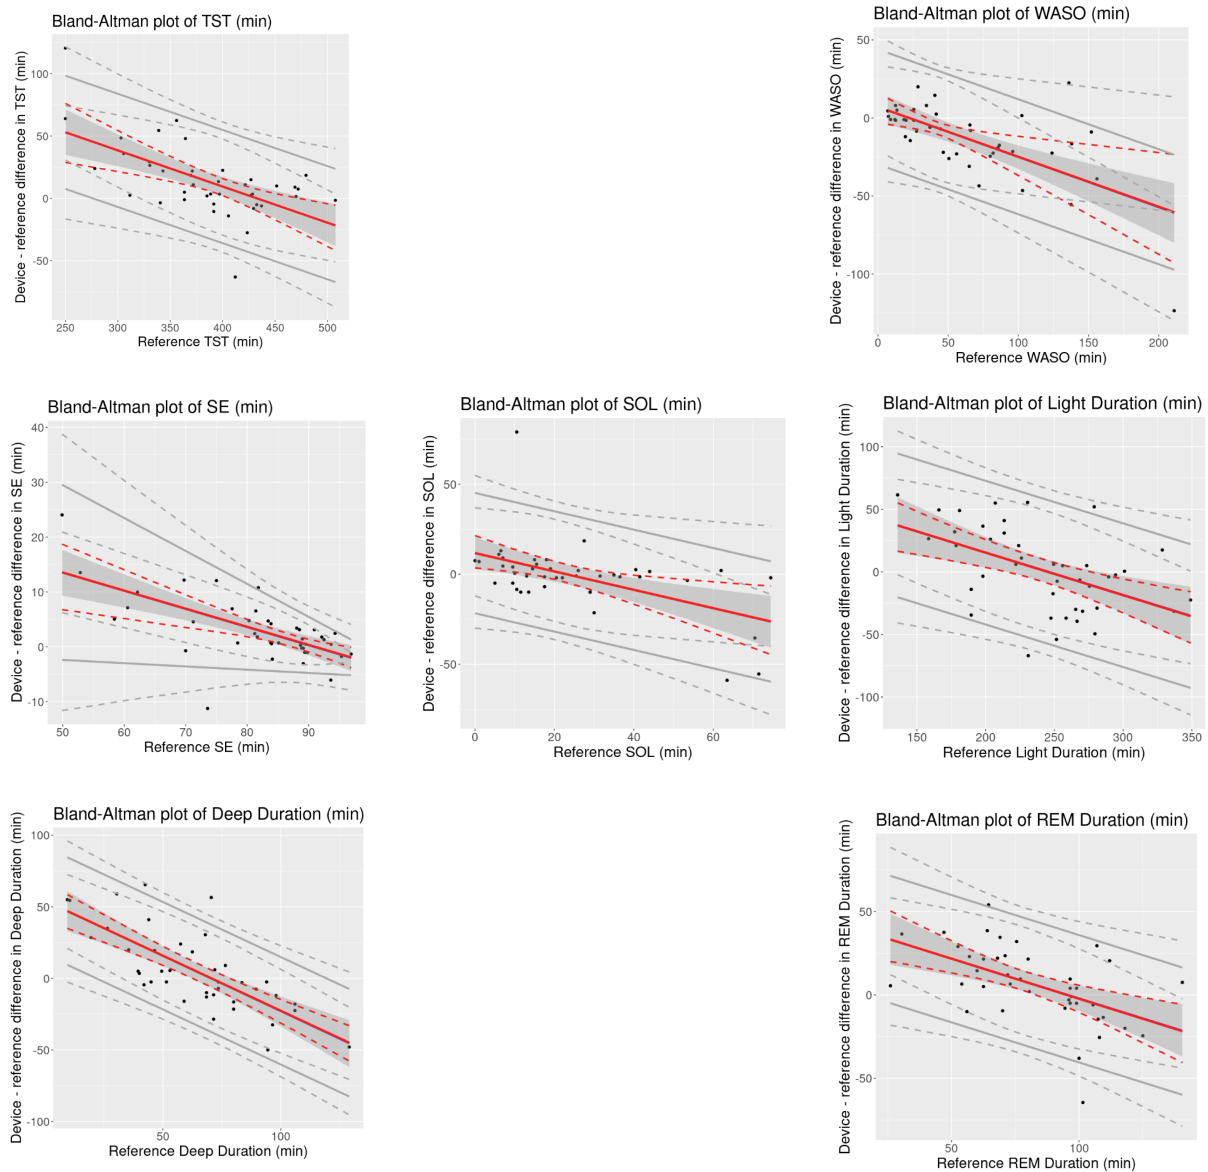

Source: https://medrxiv.org/content/10.1101/2024.09.10.24313427v1.full.pdf
